# Supplementary material for: Effects of Advance Exposure to an Animated Surgery-Related Picture Book on Preoperative Anxiety and Anesthesia Induction in Preschool Children: A Randomized Controlled Trial
Source: Research Square preprint supplement (doi:10.21203/rs.3.rs-1012258/v1), 2021-11-03
Supplement: Supplementary file 1 [file e723cb10d500b9e0761a5d0e.doc]

**
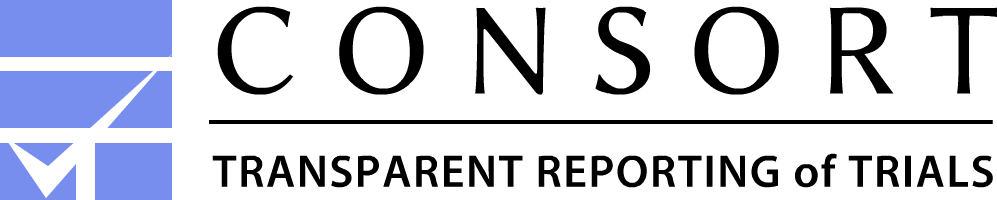
**

**CONSORT 2010 Flow Diagram**

**Allocation**

**Analysis**

**Follow-Up**

Assessed for eligibility (n=273)

Excluded (n=142)

  Not meeting inclusion criteria (n=136)

  Declined to participate (n=6)

  Other reasons (n=0)

Analysed (n=58)

Lost to follow-up (n=7)

Allocated to picture book group (n=65)

Lost to follow-up (n=8)

Allocated to control group (n=66)

Analysed (n=58)

Randomized (n=131)

Not receiving interventions (n=7)
